# Calcium Binding-Mediated Sustained Release of Minocycline from Hydrophilic Multilayer Coatings Targeting Infection and Inflammation

Zhiling Zhang<sup>1</sup>, Camilla A. Nix<sup>1</sup>, Utku K. Ercan<sup>1</sup>, Jonathan A. Gerstenhaber<sup>1</sup>, Suresh G. Joshi<sup>2</sup>, Yinghui Zhong<sup>1\*</sup>

**1** School of Biomedical Engineering, Science and Health Systems, Drexel University, Philadelphia, Pennsylvania, United States of America, **2** Surgical Infection Program, Department of Surgery and Department of Microbiology and Immunology, Drexel University College of Medicine, Philadelphia, Pennsylvania, United States of America

## Abstract

Infection and inflammation are common complications that seriously affect the functionality and longevity of implanted medical implants. Systemic administration of antibiotics and anti-inflammatory drugs often cannot achieve sufficient local concentration to be effective, and elicits serious side effects. Local delivery of therapeutics from drug-eluting coatings presents a promising solution. However, hydrophobic and thick coatings are commonly used to ensure sufficient drug loading and sustained release, which may limit tissue integration and tissue device communications. A calcium-mediated drug delivery mechanism was developed and characterized in this study. This novel mechanism allows controlled, sustained release of minocycline, an effective antibiotic and anti-inflammatory drug, from nanoscale thin hydrophilic polyelectrolyte multilayers for over 35 days at physiologically relevant concentrations. pH-responsive minocycline release was observed as the chelation between minocycline and  $\text{Ca}^{2+}$  is less stable at acidic pH, enabling 'smart' drug delivery in response to infection and/or inflammation-induced tissue acidosis. The release kinetics of minocycline can be controlled by varying initial loading,  $\text{Ca}^{2+}$  concentration, and  $\text{Ca}^{2+}$  incorporation into different layers, enabling facile development of implant coatings with versatile release kinetics. This drug delivery platform can potentially be used for releasing any drug that has high  $\text{Ca}^{2+}$  binding affinity, enabling its use in a variety of biomedical applications.

**Citation:** Zhang Z, Nix CA, Ercan UK, Gerstenhaber JA, Joshi SG, et al. (2014) Calcium Binding-Mediated Sustained Release of Minocycline from Hydrophilic Multilayer Coatings Targeting Infection and Inflammation. PLoS ONE 9(1): e84360. doi:10.1371/journal.pone.0084360

**Editor:** Ali Al-Ahmad, University Hospital of the Albert-Ludwigs-University Freiburg, Germany

**Received:** August 14, 2013; **Accepted:** November 22, 2013; **Published:** January 7, 2014

**Copyright:** © 2014 Zhang et al. This is an open-access article distributed under the terms of the Creative Commons Attribution License, which permits unrestricted use, distribution, and reproduction in any medium, provided the original author and source are credited.

**Funding:** This work was supported by the startup fund from Drexel University. The funders had no role in study design, data collection and analysis, decision to publish, or preparation of the manuscript.

**Competing Interests:** The authors have declared that no competing interests exist.

\* E-mail: yz348@drexel.edu

## Introduction

Infection and inflammation are common coexisting issues that seriously affect the functionality and longevity of a variety of medical implants including biosensors [1,2], neural prostheses [3,4], catheters [5,6], and stents [7,8], etc. Pathogenic bacteria often colonize and adhere to the implant surface to form a biofilm that causes persistent and chronic infections necessitating implant removal [9–12]. Conventional systemic antibiotic therapy is ineffective in killing bacteria within a biofilm [10–12]. Bioactive coatings capable of releasing antibacterial agents can deliver high doses of antibiotics during the “decisive period” (6 h post implantation) to inhibit initial bacterial adhesion, which is crucial for biofilm formation [10,11]. Subsequent continued release over weeks to months is desirable to ensure that tissue integration can occur before bacterial adhesion [10]. Implant-associated inflammation is caused by tissue injury and the foreign body reaction [13,14], and results in fibrotic encapsulation that compromises implant performance. For implants that are intended to monitor, record, or stimulate within the body, such as glucose sensors and neural electrodes, the fibrous capsule limits device-tissue communication. For implants that are intended to repair or replace lost tissue functions, such as stents and catheters, inflammation induces

stent restenosis and obstruction of catheters. Systemic administration of anti-inflammatory agents is often ineffective in treating local fibrotic encapsulation and long-term treatment can lead to serious side effects such as gastrointestinal symptoms (ulcers, bleeding, and perforation) [15], heart failure [16], and renal failure [17]. Thus, sustained local drug delivery from medical implants is desirable to effectively treat inflammation while limiting deleterious side effects. However, methods for co-delivery of both antibiotics and anti-inflammatory agents at physiologically relevant concentrations and time scale are limited because the drugs have different physiochemical properties [18].

Minocycline Hydrochloride (MH), a tetracycline derivative, is a broad-spectrum antibiotic and effective anti-inflammatory drug that is widely used clinically to treat infection and inflammation [19,20], making it a promising drug candidate to combat implant-associated infection and inflammation by local delivery. In designing suitable coatings for medical implants, the thickness and biocompatibility of the coating are important design considerations. Thin coatings are preferable to avoid additional tissue injury and ensure effective device-tissue communication. Moreover, hydrophilic coatings have been shown to minimize nonspecific protein adsorption and inflammatory/immune cell adhesion that would exacerbate the foreign body response

[8,13,21,22]. However, small molecules that are highly soluble in water, including MH (MW 493.94 Da), diffuse very quickly from hydrophilic thin films (on a scale of minutes to hours) [23,24], due to the lack of strong interactions between the small molecule and polymer layers.

Layer-by-layer (LbL) self-assembly technique is a versatile method to construct thin film coatings via alternative adsorption of building blocks driven by weak molecular interactions such as electrostatic force and hydrogen bonding [25]. The resulting films typically have a thickness ranging from nanoscale to microscale. However, the release of hydrophilic drugs from LbL coatings is normally very fast. Rapid penetration of water into the thin coatings combined with a lack of strong forces holding the biomolecules in place usually result in complete release of loaded drug within a few days. So far only one coating design for concurrent sustained delivery of both antibiotic and anti-inflammatory drugs was reported [18], from which the release of hydrophilic antibiotic vancomycin lasted from 4 hr to 2.3 days, and the release of hydrophobic anti-inflammatory drug diclofenac lasted from 1.7 to 14 days. In this study, we report the integration of a novel calcium binding-mediated drug delivery mechanism with electrostatic layer-by-layer (LbL) assembly to create biocompatible, hydrophilic, and nanoscale thin coatings capable of sustained release of physiologically relevant levels of MH for over 35 days. Moreover, we were able to achieve a high drug density of  $645 \mu\text{g}/\text{mm}^3$  from 8 trilayers of LbL film. In contrast, the highest drug density reported so far is  $220 \mu\text{g}/\text{mm}^3$  from 60 tetralayers of LbL film [18,26,27]. We postulate that the high drug loading capacity and sustained release reported here is due to the strong  $\text{Ca}^{2+}$  binding-mediated interactions. MH as a tetracycline derivative can chelate  $\text{Ca}^{2+}$  ions, without affecting its biological activity [28]. Dextran sulfate (DS) is a biodegradable polysaccharide that also has a high binding affinity for  $\text{Ca}^{2+}$  due to its numerous negatively charged sulfate groups [29,30]. Utilizing this property, we used  $\text{Ca}^{2+}$  as the linker to attach MH to DS. We further found that DS can form electrostatic layer by layer (LbL) assembly with gelatin type A (GA), a positively charged biodegradable natural polymer derived from collagen. Multilayers of DS- $\text{Ca}^{2+}$ -MH conjugate/GA were successfully constructed to form hydrophilic nanoscale thin coatings. We hypothesize that MH loading and release in the LbL assembly is mediated by calcium binding. Sustained MH release over 35 days was obtained from only 8 trilayers of LbL films with a thickness of 402 nm. We found that  $\text{Ca}^{2+}$ -mediated MH release was pH-responsive, probably because the binding affinity of tetracycline for  $\text{Ca}^{2+}$  decreases with pH [31,32]. Reduced extracellular pH (tissue acidosis) is commonly found under pathophysiological conditions such as tissue injury, inflammation, or infection [33–36]. Therefore, pH-responsive release of MH will potentially enable ‘smart’, tissue response-regulated drug delivery at the implant-tissue interface. MH release from these films significantly inhibited biofilm formation by bacteria from seven different strains including multi-drug resistant *Acinetobacter baumannii* (*A. baumannii*), and inhibited the activation of inflammatory macrophages. The combination of hydrophilic coatings that minimize bacterial and inflammatory cell adhesion with sustained release of anti-bacterial and anti-inflammatory MH holds great potential to combat implant-associated infection and inflammation.

## Materials and Methods

### Materials

All the chemicals were obtained from Sigma-Aldrich and used without further purification. *Escherichia coli* (ATCC 25922),

*Escherichia coli* O157:H7, *Acinetobacter baumannii* (ATCC 19606), *Staphylococcus aureus* (ATCC 25923), methicillin-resistant *Staphylococcus aureus* USA300 (BAA 1860) and *Staphylococcus epidermidis* (ATCC 12228) strains were purchased from American Type Culture Collection (ATCC, Manassas, VA). A multi-drug resistance *Acinetobacter baumannii* clinical isolate (referred as *A. baumannii* #22) was locally isolated from a hospitalized patient having invasive infection following a protocol approved by the Institutional Review Board of Drexel University. The study involves retrospective collection of isolates from clinical laboratory of the hospital, and the samples were coded so that the patient’s details were not revealed and identity was not determined. Investigator is granted waiver for this protocol and no consent is required.

### Preparation of FITC-GA conjugate

Fluorescein isothiocyanate (FITC)-labeled GA was prepared as reported [37]. Briefly, 100 mg GA was dissolved in 0.1 M sodium bicarbonate buffer at the concentration of 5 mg/ml, 350  $\mu\text{l}$  FITC solution (10 mg/ml in DMSO) was added dropwise while stirring. Size exclusion chromatography was used to remove unreacted FITC.

### LbL film assembly and characterization

LbL self-assembled films were deposited on UV-transparent 96 well plates and black 96 well plates for characterization of MH incorporation and film growth by UV absorption and fluorescence measurement, or on silicon substrates (University Wafer) for thickness measurement. 1 mg/ml solutions of dextran sulfate (DS, MW 500,000), MH, and GA were prepared in either  $\text{CaCl}_2$  solution or deionized (DI) water. The concentration of  $\text{CaCl}_2$  solution was 7.2 mM unless specified otherwise. The substrates were first coated with polyethyleneimine (PEI) as an initiating positively charged base layer, followed by alternating immersion in solutions of DS, MH, and GA with or without  $\text{Ca}^{2+}$  for 10 min. The excess molecules were removed by rinsing the substrates with DI water for 1 min between each step.

LbL film growth was monitored by UV-vis spectroscopy at 245 nm to detect MH incorporation (GA and DS have negligible absorbance at this wavelength), and fluorescence spectroscopy at an excitation wavelength of 485 nm and an emission wavelength of 535 nm to characterize FITC-labeled GA incorporation, using a Tecan M200 microplate reader (San Jose, CA). Thickness measurements were performed on films deposited on silicon wafers using a Zygo Newview 6000 optical profilometer (Middlefield, CT).

### In vitro MH release assay

LbL films were incubated in Hank’s Balanced Salt Solution (HBSS) at  $37^\circ\text{C}$  for quantification of MH release until no detectable MH was released. Every 24 h, HBSS was removed and replaced with fresh HBSS. The amount of MH released at each time point was determined by UV absorbance at 245 nm.

### Biofilm assay

Bacterial suspensions were inoculated in 96-well plates at a density of  $2 \times 10^4$  cells per well. The wells in the plates were either pre-coated with 8 bilayers of (DS+ $\text{Ca}^{2+}$ /GA+ $\text{Ca}^{2+}$ ) or 8 trilayers of (DS+ $\text{Ca}^{2+}$ /MH+ $\text{Ca}^{2+}$ /GA+ $\text{Ca}^{2+}$ ). Uncoated wells (polystyrene) were used as control. The biofilms were allowed to form by incubating at  $37^\circ\text{C}$  in a stationary incubator for 24 h [38–41]. For quantification of bacterial viability, the biofilm containing wells were washed three times with sterile PBS to remove loose planktonic cells, and 200  $\mu\text{l}$  of XTT reagent was added and

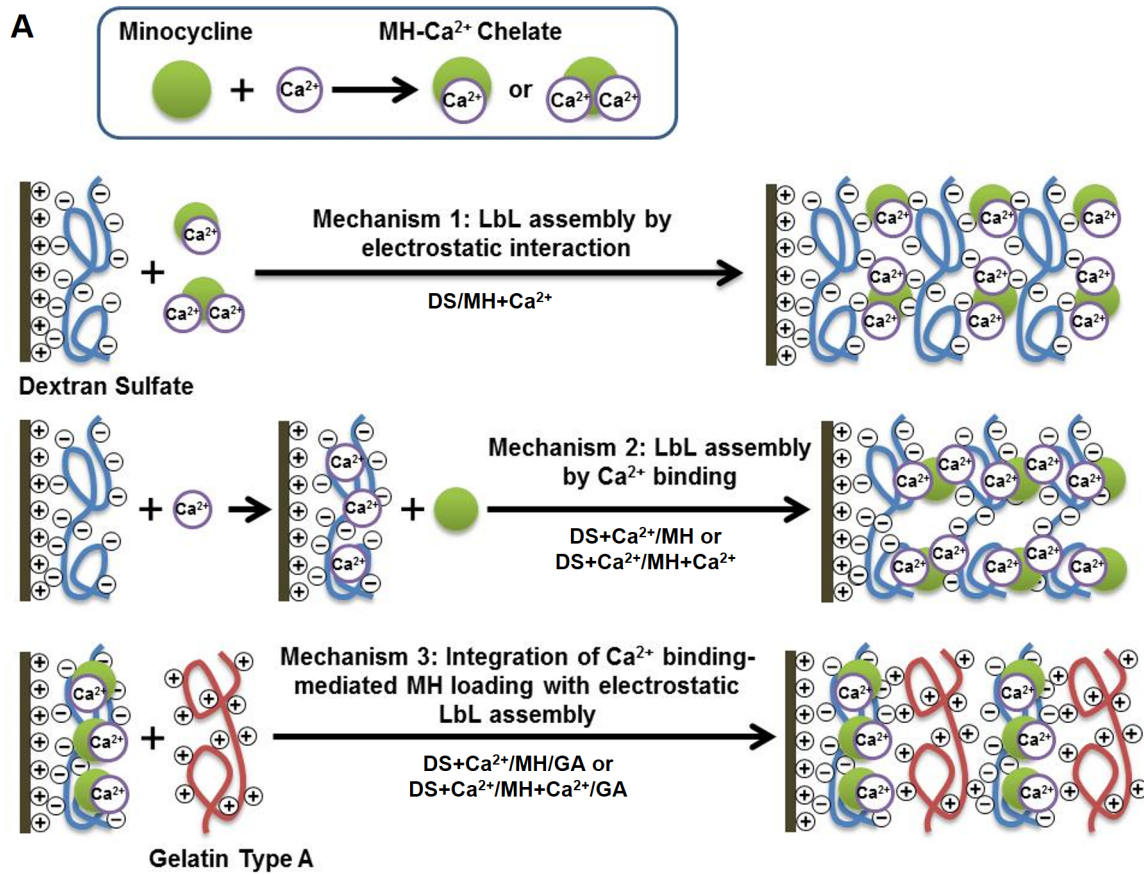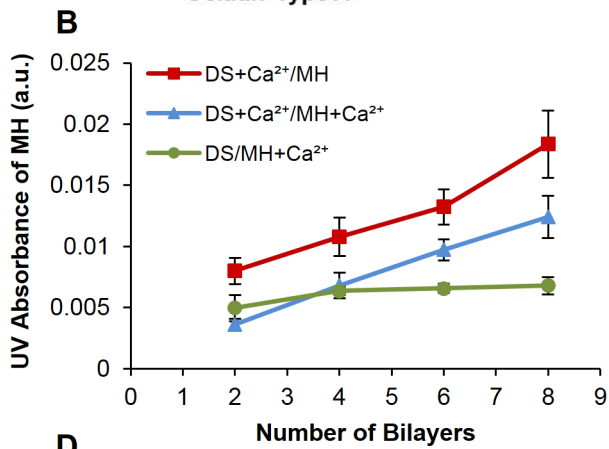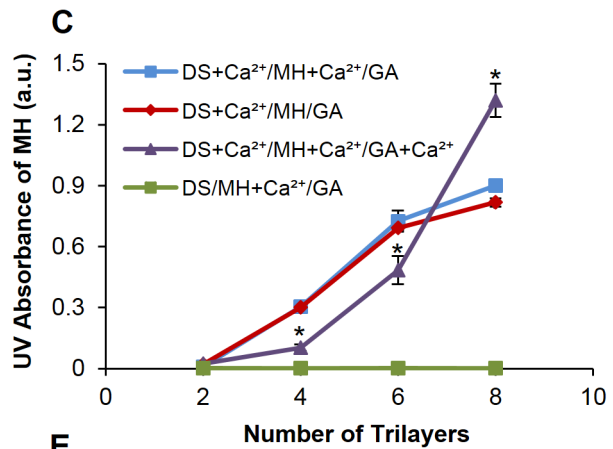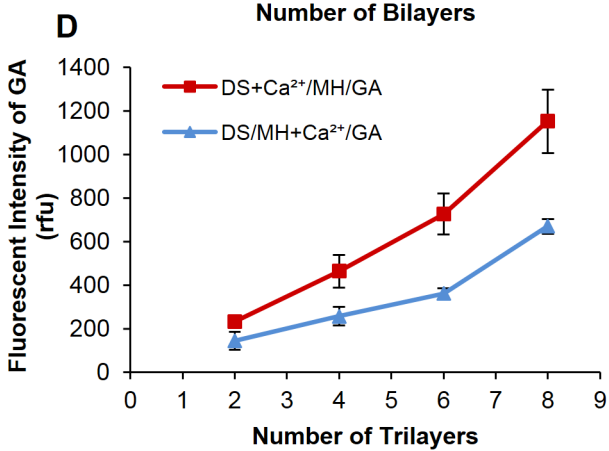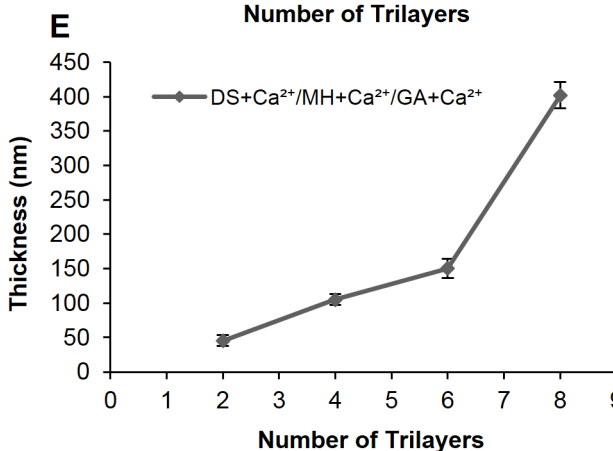

**Figure 1. Mechanism schematic and growth of LbL assembly.** (A) Schematic illustrating the mechanism of MH incorporation and LbL assembly. (B) UV absorbance of MH during DS/MH LbL assembly. (C) UV absorbance of MH during DS/MH/GA LbL assembly. \*,  $P < 0.05$  compared with (DS+Ca<sup>2+</sup>/MH/GA) and (DS+Ca<sup>2+</sup>/MH+Ca<sup>2+</sup>/GA) LbL films. (D) Fluorescent intensity of FITC-GA during DS/MH/GA LbL assembly. (E) Film thickness of as a function of the number of trilayers deposited on silicon substrates. Data shown are average  $\pm$ STD (n = 3). doi:10.1371/journal.pone.0084360.g001

incubated with biofilm for 2 h in the dark at 37°C. The metabolic conversion of XTT into orange-colored product was measured photometrically at 492 nm using a microtiter plate reader (BioTek). Only surviving/live bacterial cells show evidence of respiration and metabolize XTT reagent to reduce it to an orange colored soluble product [42]. For visualization of live and dead bacteria, the cells were stained with LIVE/DEAD BacLight Bacterial Viability kit (Invitrogen), and examined by EVOS FL Color Imaging System (AMG).

### Anti-inflammatory bioactivity of released MH

RAW264.7 murine macrophages (kindly provided by Dr. Narayan Avadhani, University of Pennsylvania) were treated with lipopolysaccharide (LPS), fresh MH (1  $\mu$ g/ml), and MH released during a 24 h period on day 32 (diluted to 1  $\mu$ g/ml). After 48 h, the accumulated levels of nitrite in the cell culture medium, as an indication of NO, were measured with Griess reagent (Promega).

### Statistical analysis

Pairwise comparisons were conducted using a general linear ANOVA model and Tukey test (two-sided), and  $P < 0.05$  was considered statistically significant. Data are presented as mean  $\pm$  standard deviations.

## Results and Discussion

### LbL multilayer film growth and characterization

Three different mechanisms of LbL assembly of DS and MH were explored in this study (Figure 1A). Coatings prepared by the first mechanism, by which negatively charged DS and positively charged MH-Ca<sup>2+</sup> chelates were alternately adsorbed onto the wells of a UV-transparent 96 well plate, showed no increase in UV absorbance at 245 nm for MH as the number of bilayers increased (Figure 1B, green line), indicating that the chelates failed to form LbL assembly with DS. This result is not surprising since electrostatic interactions between charged small molecules and polymers are typically not strong enough for LbL assembly. In contrast, adding Ca<sup>2+</sup> ions to the DS solution resulted in increased

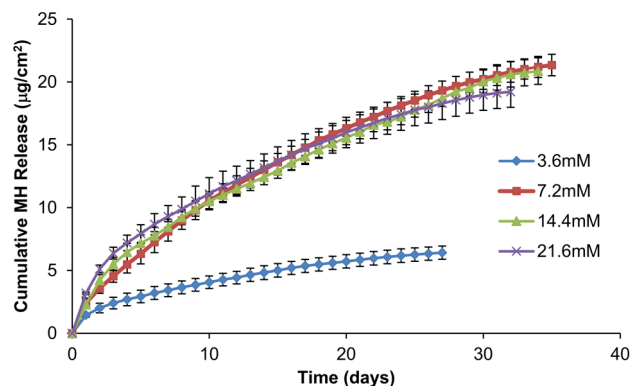

**Figure 2. Effect of Ca<sup>2+</sup> concentration on MH release from (DS+Ca<sup>2+</sup>/MH+Ca<sup>2+</sup>/GA+Ca<sup>2+</sup>)<sub>8</sub> LbL films.** Data shown are average  $\pm$ STD (n = 3). doi:10.1371/journal.pone.0084360.g002

UV absorbance of MH with increased number of bilayers (Figure 1B, blue line). It is noteworthy that LbL assembly could still form even when no Ca<sup>2+</sup> ions were added to the MH solution (Figure 1B, red line). This result revealed that Ca<sup>2+</sup> ions in DS are required for the binding of MH to DS. One MH molecule can chelate one or two Ca<sup>2+</sup> ions [28]. We speculate that MH acts as a bridge that binds to two Ca<sup>2+</sup> ions in adjacent DS layers to induce LbL assembly (Figure 1A, mechanism 2). Interestingly, this result also indicates that MH could chelate DS-bound Ca<sup>2+</sup>, but Ca<sup>2+</sup> that was already chelated by MH failed to bind to DS. We speculate that MH created steric hindrance that blocked this binding.

Drug release study of films prepared by mechanism 2 showed that only 0.34  $\mu$ g/cm<sup>2</sup> MH was loaded in 8 bilayers of (DS+Ca<sup>2+</sup>/MH) films, indicating an inefficient LbL assembly. To increase the efficiency of MH loading, we combined calcium binding-mediated MH loading mechanism with an efficient LbL assembly design (Figure 1A, Mechanism 3). GA is a positively charged biodegradable natural polymer derived from collagen. Multilayers of DS-Ca<sup>2+</sup>-MH conjugate/GA were successfully constructed to form hydrophilic nanoscale thin coatings. As shown in Figure 1C (blue and red lines), the use of GA to enhance LbL assembly caused a substantial increase in the loading of MH indicated by UV absorbance. GA failed to incorporate MH in the films when no Ca<sup>2+</sup> was added to the DS solution (Figure 1C green line), despite successful LbL film growth indicated by increased fluorescence intensity from FITC-conjugated GA (Figure 1D, blue line). This result confirms that Ca<sup>2+</sup> ions in DS layers are essential for MH loading. Taken together, these results suggest that the mechanism of MH loading was mediated by Ca<sup>2+</sup> binding, rather than electrostatic interaction.

We further studied the effect of adding Ca<sup>2+</sup> in GA layers on LbL film growth. The addition of Ca<sup>2+</sup> to the GA layer resulted in significantly lower MH loading at 4 and 6 trilayers, but significantly higher MH loading at 8 trilayers (Figure 1C, purple line). Profilometry measurements further confirmed film growth with increased number of trilayers, with an average trilayer thickness of 50 nm for DS+Ca<sup>2+</sup>/MH+Ca<sup>2+</sup>/GA+Ca<sup>2+</sup> multilayer film (Figure 1E). The thickness of (DS+Ca<sup>2+</sup>/MH+Ca<sup>2+</sup>/GA+Ca<sup>2+</sup>)<sub>8</sub> film before and after drug release was 402 $\pm$ 19 and 294 $\pm$ 65 nm respectively, indicating that most coating materials still remained after MH was depleted and MH release from the LbL coating was not mediated by degradation of the LbL films.

### Effect of Ca<sup>2+</sup> concentration on MH loading and release

We found that the concentration of Ca<sup>2+</sup> ions in the coating solutions affect MH loading and release (Figure 2). Increasing Ca<sup>2+</sup> concentration from 3.6 to 7.2 mM increased drug loading in 8 trilayers of LbL films from 6.4 to 21.4  $\mu$ g/cm<sup>2</sup>, and prolonged the duration of MH release from 27 to 35 days. However, further increasing Ca<sup>2+</sup> concentration above 7.2 mM slightly reduced drug loading and the duration of MH release in a dose-dependent fashion, suggesting that 7.2 mM is the optimum concentration for high drug loading and extended release. We speculate that high concentration (above 7.2 mM) of Ca<sup>2+</sup> ions in the coating solution can overcome the attraction of MH by Ca<sup>2+</sup> ions in the LbL film and causing detachment of MH from the coating. Thus, 7.2 mM Ca<sup>2+</sup> was used in the following studies.

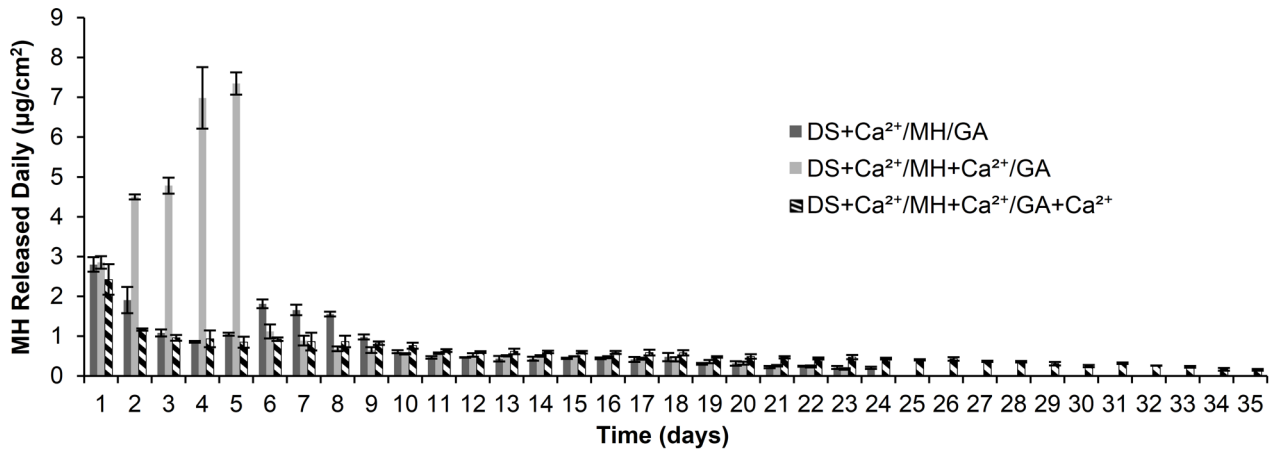

**Figure 3. Effect of  $\text{Ca}^{2+}$  incorporation on MH release from  $(\text{DS}+\text{Ca}^{2+}/\text{MH}+\text{Ca}^{2+}/\text{GA}+\text{Ca}^{2+})_8$  LbL films.** Data shown are average  $\pm$ STD ( $n=3$ ).  
doi:10.1371/journal.pone.0084360.g003

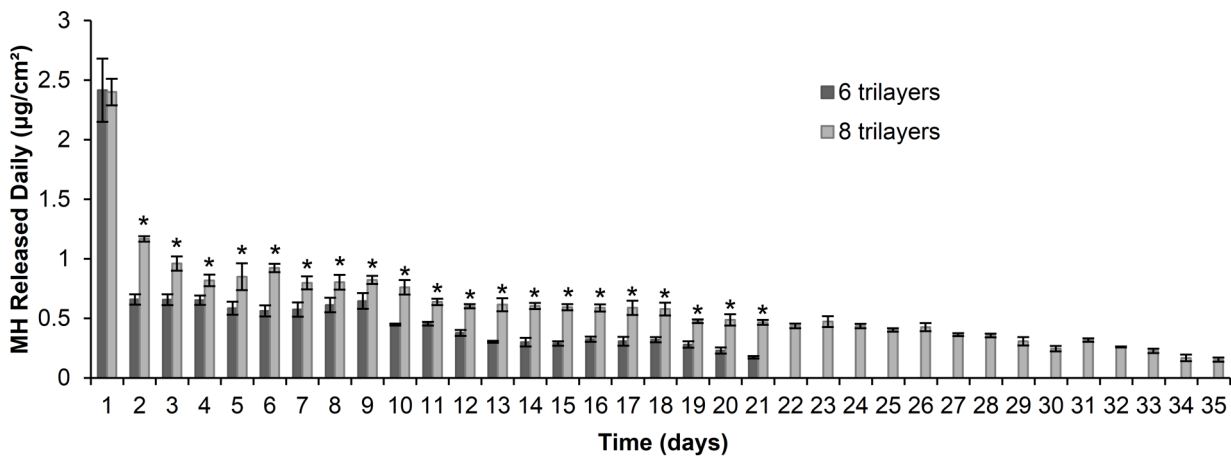

**Figure 4. Daily MH release from 6 and 8 trilayers of  $(\text{DS}+\text{Ca}^{2+}/\text{MH}+\text{Ca}^{2+}/\text{GA}+\text{Ca}^{2+})_8$ .** \*,  $P<0.05$  compared with release from 6 trilayers. Data shown are average  $\pm$ STD ( $n=3$ ).  
doi:10.1371/journal.pone.0084360.g004

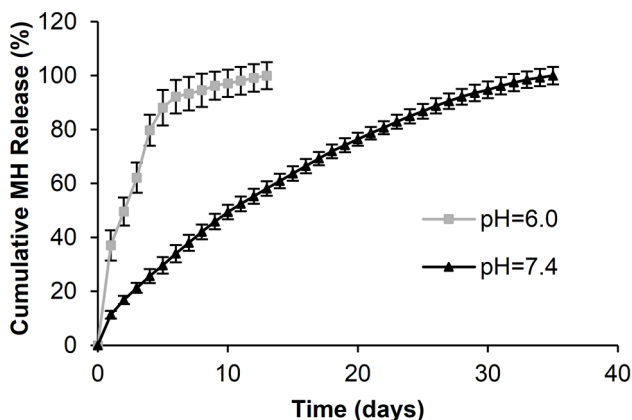

**Figure 5. Effect of pH on MH release from  $(\text{DS}+\text{Ca}^{2+}/\text{MH}+\text{Ca}^{2+}/\text{GA}+\text{Ca}^{2+})_8$  LbL films.** Data shown are average  $\pm$ STD ( $n=3$ ).  
doi:10.1371/journal.pone.0084360.g005

#### Effect of $\text{Ca}^{2+}$ incorporation in MH and GA layers on MH release kinetics

Since MH loading and release are mediated by  $\text{Ca}^{2+}$  binding and gelatin also has  $\text{Ca}^{2+}$  binding affinity [43], incorporation of  $\text{Ca}^{2+}$  in MH and GA layers may affect the release kinetics. As shown in Figure 3, for  $(\text{DS}+\text{Ca}^{2+}/\text{MH}/\text{GA})_8$  multilayer films there was an initial burst release during the first two days, and a second burst release between 6–8 days, followed by a slow, stable release until 24 days. Adding  $\text{Ca}^{2+}$  in DS and MH layers, but not GA layers resulted in a high initial burst during the first 5 days, with accelerating release of MH during this period, followed by a slow, stable release up to 21 days. Both release profiles indicate a destabilization of MH binding in the LbL films during release. These release profiles may be beneficial for the treatment of acute or recurrent pathological conditions where high initial burst or pulsed release is desired. However, stable drug release is required for the treatment of chronic conditions. We found that addition of  $\text{Ca}^{2+}$  in GA layers eliminated the destabilization effect. MH release from  $(\text{DS}+\text{Ca}^{2+}/\text{MH}+\text{Ca}^{2+}/\text{GA}+\text{Ca}^{2+})_8$  films showed a low initial burst release, followed by slow, stable release for over 35 days, suggesting a more stable MH binding. Incorporation of  $\text{Ca}^{2+}$



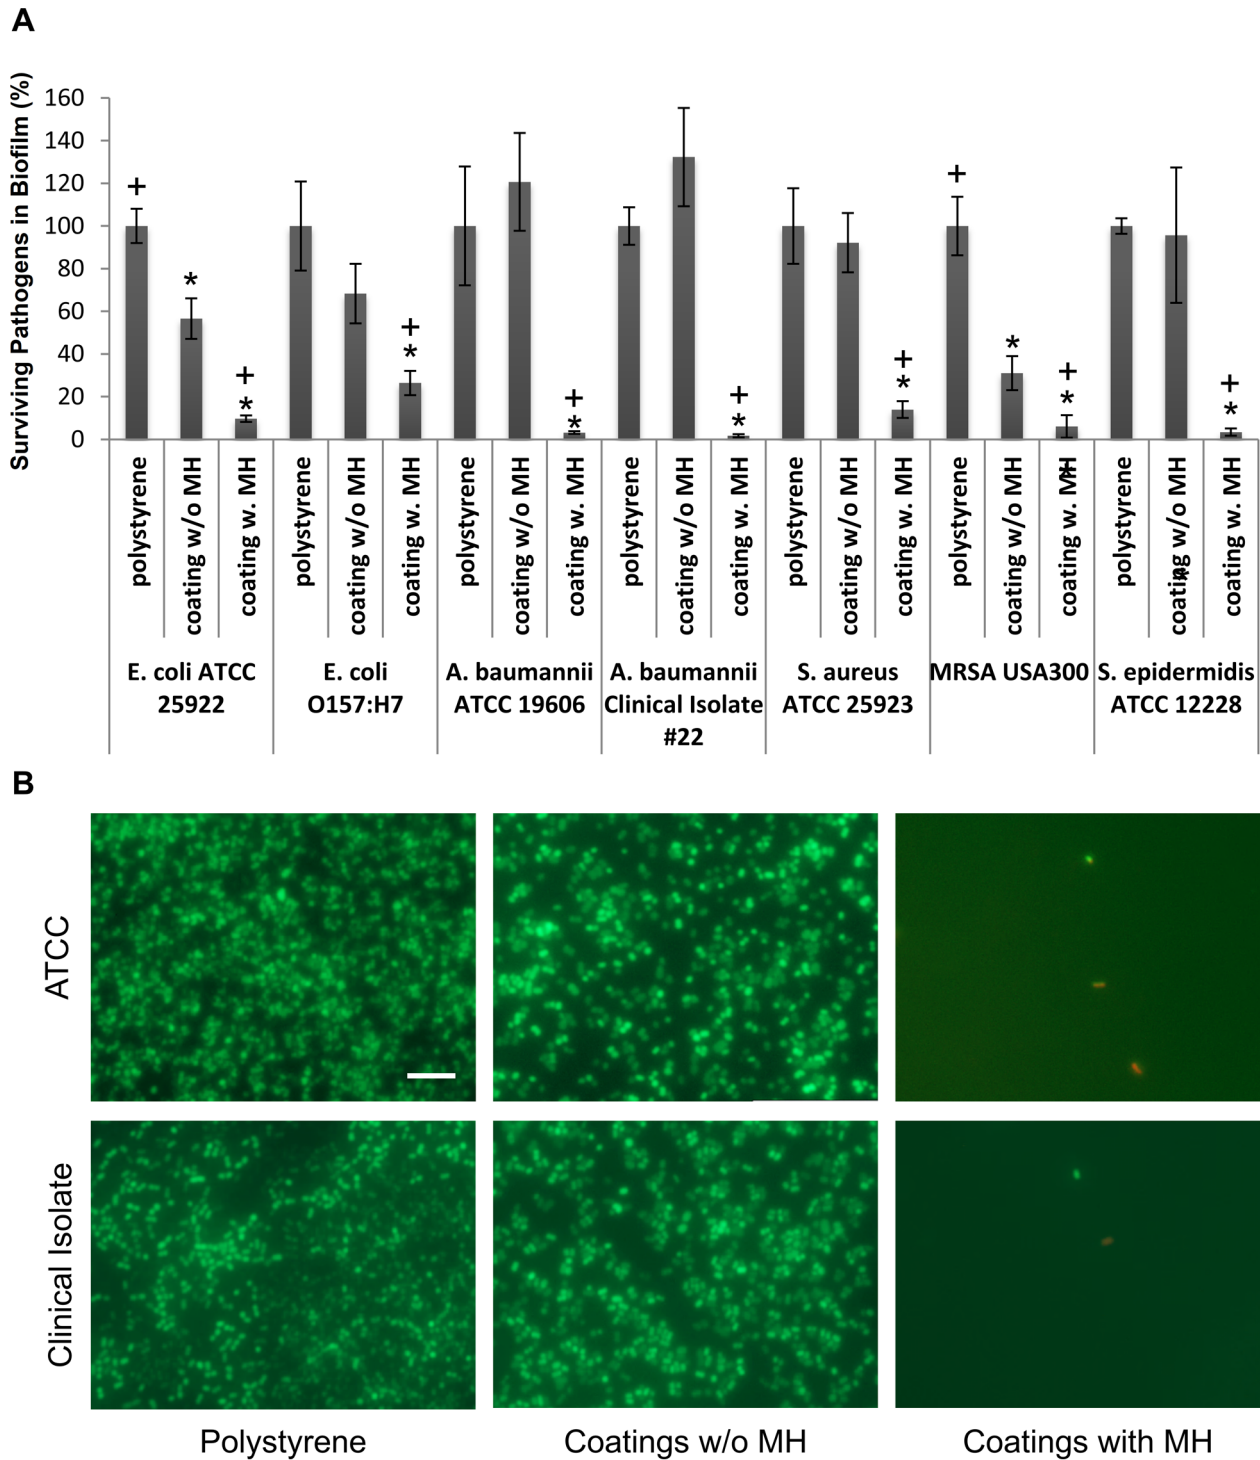

**Figure 6. The anti-biofilm activity of  $(DS+Ca^{2+}/MH+Ca^{2+}/GA+Ca^{2+})_8$  LbL film.** (A) XTT assays to detect surviving bacteria demonstrate inactivation of bacteria in biofilms as a result of MH release from coatings. Significant anti-biofilm activity was observed in the wells coated with films containing MH. \*,  $P < 0.05$  compared with uncoated control (polystyrene); +,  $P < 0.05$  compared with coatings without MH. Data shown are average  $\pm$  STD ( $n = 4$ ). (B) Fluorescent images of *A. baumannii* from ATCC and clinical isolate cultured on uncoated polystyrene, coatings with and without MH. The cells were stained with “live” SYTO 9 stain (green) and “dead” propidium iodide stain (red). Biofilm formation was eliminated on coatings with MH. Scale bar = 10  $\mu$ m.  
doi:10.1371/journal.pone.0084360.g006

in the GA layers may increase the amount of  $Ca^{2+}$  ions in the LbL film and thereby increase the capacity of the film to attract MH. Control over release behavior using  $Ca^{2+}$  binding may allow its application to various pathological situations.

#### Effect of initial loading on MH release

MH release can also be tailored by adjusting its initial loading (number of trilayers). Increasing the number of trilayers of  $(DS+Ca^{2+}/MH+Ca^{2+}/GA+Ca^{2+})$  LbL films from 6 to 8 signifi-

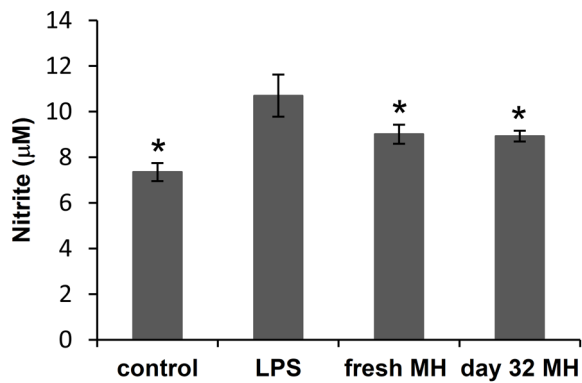

**Figure 7. The anti-inflammatory activity of MH released from  $(DS+Ca^{2+}/MH+Ca^{2+}/GA+Ca^{2+})_8$  LbL film.** NO production by macrophages treated with LPS, LPS and fresh MH (1 µg/ml), or LPS and MH released on day 32 (diluted to 1 µg/ml). NO level in cells without any treatment was used as control. \*,  $P < 0.05$  compared with LPS-treated culture. Data shown are average  $\pm$ STD (n=3). doi:10.1371/journal.pone.0084360.g007

cantly increased the amount of MH released every day except the first day, and prolonged the release time from 21 to 35 days (Figure 4).

#### Effect of pH on MH release

To simulate pathological and physiological conditions, HBSS with pH of 6.0 and 7.4 were used as the release media. MH release from  $(DS+Ca^{2+}/MH+Ca^{2+}/GA+Ca^{2+})_8$  multilayer films only lasted 13 days at pH 6.0, with a high initial burst release, versus 35 days of sustained release and a small burst release at physiological pH (Figure 5), suggesting that  $Ca^{2+}$  binding-mediated MH release is pH-sensitive. Studies have shown that the binding affinity of tetracycline for  $Ca^{2+}$  decreases with pH [31,32]. Thus, reduced pH can weaken the chelation between MH and DS-bound  $Ca^{2+}$  and facilitate MH release. This result suggests that in addition to detachment of MH- $Ca^{2+}$  chelates from DS, MH release can also be mediated by dissociation of MH from the chelates. This property will potentially enable ‘smart’ drug release in response to infection and/or inflammation-induced tissue acidosis at the implant-tissue interface.

#### Bioactivity of released MH

To evaluate the antibacterial and anti-biofilm efficacies of this novel coating, we selected seven bacterial species that are known to be involved in implant-associated infection, including a multi-drug resistant *A. baumannii* clinical isolate that was locally isolated from a hospitalized patient having invasive infection. *A. baumannii* is one of the antimicrobial-resistant bacilli that are most difficult to control and treat in clinical settings and is a strong biofilm producer [44]. Figure 6A demonstrates that coatings incorporating MH significantly inhibited biofilm formation by all seven virulent pathogens, leaving negligible pathogens in the biofilm. Although the body’s natural defense system is often ineffective to remove bacterial within a biofilm, it is effective to clear adherent bacteria once the granulocytes can penetrate the biofilm. Thus, these low numbers of surviving bacteria are often cleared easily by the body’s defense system since no biofilm was formed [45]. *A. baumannii* from ATCC and clinical isolate were stained with LIVE/DEAD BacLight Bacterial Viability Kit. As shown in Figure 6B, *A. baumannii* from both sources formed biofilm on uncoated polystyrene and coatings without MH, whereas only a few bacteria were present on coatings with MH.

The anti-inflammatory potency of released MH was studied using RAW264.7 macrophages. LPS was used to stimulate the macrophages to the inflammatory phenotype, which is marked by upregulation of nitric oxide (NO), a potent inflammatory mediator and cytotoxic molecule [46]. Studies have shown that MH as an anti-inflammatory drug can inhibit the activation of macrophages and NO production [47,48]. MH released during a 24 h period on day 32 was diluted to 1 µg/ml and added to LPS-treated macrophage cultures. Cultures treated with LPS and 1 µg/ml fresh MH were used as controls. Released MH significantly inhibited LPS-induced NO production to the same degree as freshly prepared MH (Figure 7), suggesting that released MH retained the same bioactivity as fresh MH even after one month of release.

#### Cytotoxicity of the LbL coatings

The cytotoxicity of the coatings was evaluated using NIH 3T3 fibroblasts (Figure S1). Cells treated with release media collected from coatings with or without MH showed similar viability as cells without any treatment (Figure S1A). The morphology of fibroblasts incubated with release medium was comparable to that of untreated control (Figure S1B–D). The release media contain released DS and GA (data not shown). This result suggests that released MH and coating materials are not cytotoxic.

#### Conclusions

In conclusion, a  $Ca^{2+}$  binding-mediated drug delivery mechanism was developed in this study. This mechanism allows for efficient loading and sustained release of MH, an effective antibiotic and anti-inflammatory drug, from nanoscale thin hydrophilic LbL films. The release kinetics of MH is mediated by calcium binding and can be controlled by varying initial loading,  $Ca^{2+}$  concentration, and adding  $Ca^{2+}$  into different layers, facilitating easy customization of versatile coatings with tailored release kinetics. This drug delivery system also allows pH-responsive MH release, enabling ‘smart’ drug release in response to the severity of infection and inflammation. This versatile drug delivery system will be especially useful for infection/inflammation-susceptible medical devices such as transcatheter catheters, neural electrodes, and biosensors. In addition, the  $Ca^{2+}$  binding-mediated drug delivery mechanism can potentially be applied to other drugs and/or polymers with high  $Ca^{2+}$  binding affinity, enabling its use in a variety of biomedical applications.

#### Supporting Information

**Figure S1 Cytotoxicity assay.** (A) Cell viability under different treatments. Data shown are average  $\pm$ STD (n=3). Phase contrast images show the morphology of 3T3 fibroblast cells (stained with cresyl violet) following 24 h treatment with (A) no treatment control, (B) release medium from LbL films containing MH, and (C) release medium from LbL films without MH. Scale bar = 100 µm. (TIF)

#### Acknowledgments

We thank Dr. Narayan Avadhani (Department of Animal Biology, University of Pennsylvania) for kindly providing RAW264.7 macrophages.

#### Author Contributions

Conceived and designed the experiments: ZZ SGJ YZ. Performed the experiments: ZZ CAN UKE JAG. Analyzed the data: ZZ UKE YZ.

Contributed reagents/materials/analysis tools: SGJ YZ. Wrote the paper: ZZ UKE SGJ YZ.

## References

- Le NN, Rose MB, Levinson H, Klitzman B (2011) Implant healing in experimental animal models of diabetes. *J Diabetes Sci Technol* 5: 605–618.
- Novak MT, Yuan F, Reichert WM (2010) Modeling the relative impact of capsular tissue effects on implanted glucose sensor time lag and signal attenuation. *Anal Bioanal Chem* 398: 1695–1705.
- Schwartz AB (2004) Cortical neural prosthetics. *Annu Rev Neurosci* 27: 487–507.
- Bhatia S, Zhang K, Oh M, Angle C, Whiting D (2010) Infections and hardware salvage after deep brain stimulation surgery: a single-center study and review of the literature. *Stereotact Funct Neurosurg* 88: 147–155.
- Liedberg H (1989) Catheter induced urethral inflammatory reaction and urinary tract infection. An experimental and clinical study. *Scand J Urol Nephrol Suppl* 124: 1–43.
- Zhong Y, Bellamkonda RV (2008) Biomaterials for the central nervous system. *J R Soc Interface* 5: 957–975.
- Del Pace S, Boddi M, Rasoini R, Micheli S, Alderighi C, et al. (2010) Acute infection-inflammation and coronary stent thrombosis: an observational study. *Intern Emerg Med* 5: 121–126.
- Hezi-Yamit A, Sullivan C, Wong J, David L, Chen M, et al. (2009) Impact of polymer hydrophilicity on biocompatibility: implication for DES polymer design. *J Biomed Mater Res A* 90: 133–141.
- Costerton JW, Stewart PS, Greenberg EP (1999) Bacterial biofilms: a common cause of persistent infections. *Science* 284: 1318–1322.
- Hetrick EM, Schoenfisch MH (2006) Reducing implant-related infections: active release strategies. *Chem Soc Rev* 35: 780–789.
- Poelstra KA, Barekzi NA, Rediske AM, Felts AG, Slunt JB, et al. (2002) Prophylactic treatment of gram positive and gram negative abdominal implant infections using locally delivered polyclonal antibodies. *J Biomed Mater Res* 60: 206–215.
- Wu P, Grainger DW (2006) Drug/device combinations for local drug therapies and infection prophylaxis. *Biomaterials* 27: 2450–2467.
- Anderson JM (2001) Biological responses to materials. *Annu Rev Mater Res* 31: 81–110.
- Anderson JM, Langone JJ (1999) Issues and perspectives on the biocompatibility and immunotoxicity evaluation of implanted controlled release systems. *J Control Release* 57: 107–113.
- Bjarnason I, Hayllar J, MacPherson AJ, Russell AS (1993) Side effects of nonsteroidal anti-inflammatory drugs on the small and large intestine in humans. *Gastroenterology* 104: 1832–1847.
- Page J, Henry D (2000) Consumption of NSAIDs and the development of congestive heart failure in elderly patients: an underrecognized public health problem. *Arch Intern Med* 160: 777–784.
- Pirson Y, van Ypersele de Strihou C (1986) Renal side effects of nonsteroidal anti-inflammatory drugs: clinical relevance. *Am J Kidney Dis* 8: 338–344.
- Shukla A, Fuller RC, Hammond PT (2011) Design of multi-drug release coatings targeting infection and inflammation. *J Control Release* 155: 159–166.
- Bernier C, Dreno B (2001) Minocycline. *Ann Dermatol Venereol* 128: 627–637.
- Nieman GF, Zerler BR (2001) A role for the anti-inflammatory properties of tetracyclines in the prevention of acute lung injury. *Curr Med Chem* 8: 317–325.
- Onuki Y, Bhardwaj U, Papadimitrakopoulos F, Burgess DJ (2008) A review of the biocompatibility of implantable devices: current challenges to overcome foreign body response. *J Diabetes Sci Technol* 2: 1003–1015.
- Lu Y, Wang D, Li T, Zhao X, Cao Y, et al. (2009) Poly(vinyl alcohol)/poly(acrylic acid) hydrogel coatings for improving electrode-neural tissue interface. *Biomaterials* 30: 4143–4151.
- Déjgnat C, Shchukin DG, Sukhorukov GB (2006) Microcapsules through Layer-by-Layer Assembly Technique. In: Swapan KG, editor. *Functional Coatings*: John Wiley & Sons. pp. 67–83.
- Burke SE, Barrett CJ (2004) pH-Dependent Loading and Release Behavior of Small Hydrophilic Molecules in Weak Polyelectrolyte Multilayer Films. *Macromolecules* 37: 5375–5384.
- Boudou T, Crouzier T, Ren K, Blin G, Picart C (2010) Multiple functionalities of polyelectrolyte multilayer films: new biomedical applications. *Adv Mater* 22: 441–467.
- Shukla A, Avadhany SN, Fang JC, Hammond PT (2010) Tunable vancomycin releasing surfaces for biomedical applications. *Small* 6: 2392–2404.
- Chuang HF, Smith RC, Hammond PT (2008) Polyelectrolyte multilayers for tunable release of antibiotics. *Biomacromolecules* 9: 1660–1668.
- Soliman GM, Choi AO, Maysinger D, Winnik FM (2010) Minocycline Block Copolymer Micelles and their Anti-Inflammatory Effects on Microglia. *Macromol Biosci* 10: 278–288.
- Reis CP, Veiga EJ, Ribeiro AJ, Neufeld RJ, Damge C (2008) Nanoparticulate biopolymers deliver insulin orally eliciting pharmacological response. *J Pharm Sci* 97: 5290–5305.
- Huster D, Arnold K (1998) Ca<sup>2+</sup>-mediated interaction between dextran sulfate and dimyristoyl-sn-glycero-3-phosphocholine surfaces studied by H-2 nuclear magnetic resonance. *Biophys J* 75: 909–916.
- Jin LH, Amaya-Mazo X, Apel ME, Sankisa SS, Johnson E, et al. (2007) Ca<sup>2+</sup> and Mg<sup>2+</sup> bind tetracycline with distinct stoichiometries and linked deprotonation. *Biophys Chem* 128: 185–196.
- Carlotti B, Cesaretti A, Elisei F (2012) Complexes of tetracyclines with divalent metal cations investigated by stationary and femtosecond-pulsed techniques. *Phys Chem Chem Phys* 14: 823–834.
- Menkin V, Warner CR (1937) Studies on Inflammation: XIII. Carbohydrate Metabolism, Local Acidosis, and the Cytological Picture in Inflammation. *Am J Pathol* 13: 25–44 21.
- Gupta AK, Zygun DA, Johnston AJ, Steiner LA, Al-Rawi PG, et al. (2004) Extracellular Brain pH and Outcome following Severe Traumatic Brain Injury. *J Neurotrauma* 21: 678–684.
- Johnson MD, Kao OE, Kipke DR (2007) Spatiotemporal pH dynamics following insertion of neural microelectrode arrays. *J Neurosci Methods* 160: 276–287.
- Pautke C, Otto S, Reu S, Kolk A, Ehrenfeld M, et al. (2011) Bisphosphonate related osteonecrosis of the jaw—manifestation in a microvascular iliac bone flap. *Oral Oncol* 47: 425–429.
- The TH, Feltkamp TE (1970) Conjugation of fluorescein isothiocyanate to antibodies. I. Experiments on the conditions of conjugation. *Immunology* 18: 865–873.
- Telang NV, Satpute MG, Niphadkar KB, Joshi SG (2010) An increased incidence of biofilm-producing multidrug-resistant methicillin-resistant *Staphylococcus aureus* in a tertiary care hospital from India: A 2-year study. *Am J Infect Control* 38: 165–166.
- Joshi SG, Paff M, Friedman G, Fridman G, Fridman A, et al. (2010) Control of methicillin-resistant *Staphylococcus aureus* in planktonic form and biofilms: A biocidal efficacy study of nonthermal dielectric-barrier discharge plasma. *Am J Infect Control* 38: 293–301.
- Satpute MG, Telang NV, Dhakephalkar PK, Niphadkar KB, Joshi SG (2011) Isolation of *Burkholderia cenocepacia* J 2315 from non-cystic fibrosis pediatric patients in India. *Am J Infect Control* 39: e21–e23.
- Ercan UK, Wang H, Ji H, Fridman G, Brooks AD, et al. (2013) Nonequilibrium Plasma-Activated Antimicrobial Solutions are Broad-Spectrum and Retain their Efficacies for Extended Period of Time. *Plasma Process Polym* 10: 544–555.
- Joshi SG, Paff M, Friedman G, Fridman G, Fridman A, et al. (2010) Control of methicillin-resistant *Staphylococcus aureus* in planktonic form and biofilms: a biocidal efficacy study of nonthermal dielectric-barrier discharge plasma. *Am J Infect Control* 38: 293–301.
- Tendeloo HJC (1936) A new and easy method for the potentiometric determination of calcium concentration in solutions. *J Biol Chem* 113: 333–339.
- Eliopoulos GM, Maragakis LL, Perl TM (2008) *Acinetobacter baumannii*: epidemiology, antimicrobial resistance, and treatment options. *Clin Infect* 46: 1254–1263.
- Zimmerli W, Sendi P (2011) Pathogenesis of implant-associated infection: the role of the host. *Semin Immunopathol* 33: 295–306.
- Coleman JW (2001) Nitric oxide in immunity and inflammation. *Int Immunopharmacol* 1: 1397–1406.
- Amin AR, Attur MG, Thakker GD, Patel PD, Vyas PR, et al. (1996) A novel mechanism of action of tetracyclines: effects on nitric oxide synthases. *Proc Natl Acad Sci U S A* 93: 14014–14019.
- Dunston CR, Griffiths HR, Lambert PA, Staddon S, Vernallis AB (2011) Proteomic analysis of the anti-inflammatory action of minocycline. *Proteomics* 11: 42–51.
